# Supplementary material for: Biomimicry in French Urban Projects: Trends and Perspectives from the Practice
Source: MDPI journal article supplement (doi:10.3390/biomimetics6020027), 2021-04-27
Supplement: s1 [file s1]

## Variables and classification options definitions (Table 2)

**Year of design:** Project design year

**Project status:** Actual project status.

**Accepted and constructed or under construction:** Projects accepted by project owners and constructed or under construction.

**Accepted but not constructed:** Projects accepted by project owners but not built.

**Not Accepted:** Projects not accepted by project owners.

**Housing:** Projects that mainly aims to provide new housing units.

**Equipment:** Projects that receive public and offer benefits to a broad population, like schools, hospitals, churches, and other sport and cultural projects.

**Office:** Projects that aim commercial or business use, as offices and stores.

**Mixed-use:** Projects with a mix of different uses, without a predominant one.

### Renovation

**Partial renovation on the project:** The project has some level of retrofitting on existing infrastructures.

**No renovation :** The project does not have any retrofitting.

**Aimed objectives with the biomimetic approach:** objectives aimed by designers with the biomimetic approach

**Thermal comfort:** Biomimicry was used to improve the thermal comfort of the project.

**Visual/lighting comfort:** Biomimicry was used to address the project's visual and/or lighting comfort.

**Acoustic comfort:** Biomimicry was used to address the acoustic comfort of the project.

**Indoor air quality:** Biomimicry was used to promote better indoor air quality.

**Outdoor air quality:** Biomimicry was used to promote better outdoor air quality.

**Resistance to mechanical stress:** Biomimicry was used to face structural challenges and reduce structural charges.

**Indoor water management:** Biomimicry was used to manage water used inside the building as potable and wastewater.

**Outdoor water management:** Biomimicry was used to manage rain and stormwater.

**Biodiversity hosting:** Biomimicry was used to promote a better accommodation of biodiversity in the project, promoting habitat offer.

**Adaptation to climate change:** Biomimicry was used to face the new urban challenges related to climate change, promoting adaptability to new climatic conditions.

**Lightening of the structure:** Biomimicry was used to reduce the overall structure weight.

**Waste management:** Biomimicry was used to promote waste management solutions.

**Others:** Other objectives that do not fit on the above classifications (not specified).

**Integration level of the biomimetic approach:** Different project levels in which biomimicry was applied.

**Materials:** Biomimicry was applied on building construction materials.

**Technology:** Biomimicry was applied on specific building support technologies (as waste treatment and decontaminations systems)

**Façade/roof/floor system:** Biomimicry was applied most at the envelope level, affecting the façade, roof and or floor.

**Building:** Biomimicry was applied at the building scale, affecting its form, structure and other main characteristics.

**Plot/Neighbourhood:** Biomimicry was applied beyond the building scale, affecting the urban area and land use design at the plot or neighbourhood scale.

**Type of biological model:** Macro classification of the biological models

**Eukaryotes – Animals**

**Eukaryotes – Plants**

**Eukaryotes – Fungi**

**Archea/Bacteria**

**Ecosystems**

**Aimed labels and certifications families:** Sustainable labels aimed or achieved by the projects

**Batiment passif**

**BDM**

**BiodiverCity**

**BREEAM**

**Cradle to Cradle**

**E+C-**

**Effinergie**

**HQE**

**LBC**

**LEED**

**Matériaux biosourcés**

**Nature-Art-Education**

**NF Habitat**

**RT2012**

**WELL**

**Lessons learned:** Text excerpts from each project factsheet stating the lessons learned with the project design.
