# Supplementary material for: Biomimicry in French Urban Projects: Trends and Perspectives from the Practice
Source: Biomimetics (Basel). 2021 Apr 27;6(2):27. doi: 10.3390/biomimetics6020027 (PMC8167731; doi:10.3390/biomimetics6020027)
Supplement: Supplementary file 1 [file biomimetics-06-00027-s001.zip]

Archive with 4 entries (4 files):
- S1 - Table - Projects data.xlsx
- S3 - Original source document -EtatDesLieux-BCL-20201223-web-BasDef.pdf
- biomimetics-1144442-si.pdf
- S2 - Textual excerpts - export lecons.pdf
