# Supplementary material for: Biomimicry in French Urban Projects: Trends and Perspectives from the Practice
Source: Biomimetics (Basel). 2021 Apr 27;6(2):27. doi: 10.3390/biomimetics6020027 (PMC8167731; doi:10.3390/biomimetics6020027)
Supplement: Supplementary file 1 [file biomimetics-06-00027-s001.zip › S1 - Table - Projects data.xlsx]

## Sheet: Projects data
#	Project name	Project Location	Status	Project type	Design year	Retrofitting	Labels	Aimed objectives
1	Alguesens	Paris, France	Accepted - not built	Housing	2016	No	NF Habitat HQE - Excellent	Indoor water management;Others (not specified);Waste management;Indoor air quality;Outdoor water management;Biodiversity hosting;Thermal comfort
2	Bangkok I'm Fashion Hub	Bangkok, Thailand	Not accepted	Equipement	2015	No	*	Outdoor air quality;Resistance to mechanical stress;Lightening of the structure;Indoor air quality;Outdoor water management;Visual/lighting comfort;Climate change adaptation;Biodiversity hosting;Thermal comfort
3	Biolum_Reef	Marseille, France	Accepted - not built	Equipement	2017	No	*	Outdoor air quality;Resistance to mechanical stress;Lightening of the structure;Indoor water management;Others (not specified);Waste management;Indoor air quality;Outdoor water management;Visual/lighting comfort;Climate change adaptation;Biodiversity;Thermal comfort hosting
4	CIRC Lyon	Lyon, France	Accepted - built/under construction	Office	2018	No	WELL SILVER	Visual/lighting comfort;Thermal comfort
5	Quartier de Gally (Cité Fertile - Terres de Versailles)	Versailles, France	Accepted - built/under construction	Mixed-use	2018	Partial	E+C;Nature-Art-Education;Batiment passif	Waste management;Outdoor air quality;Indoor air quality;Outdoor water management;Visual/lighting comfort;Climate change adaptation;Biodiversity hosting;Thermal comfort
6	Ecoquartier Smartseille	Marseille, France	Accepted - built/under construction	Mixed-use	2013	No	NF Habitat;BDM;Effinergie+;NF HQE;BiodiverCity	Climate change adaptation;Biodiversity hosting;Thermal comfort;Others (not specified)
7	Ecotone	Arcueil, France	Accepted - not built	Office	2017	No	BREEAM Very Good;HQE Tres performant; BiodiverCity; Cradle to Cradle;E+C-;Matériaux biosourcés	Waste management;Indoor air quality;Acoustic comfort;Outdoor water management;Visual/lighting comfort;Climate change adaptation;Biodiversity hosting;Thermal comfort
8	Eglise de Nianing	Nianing, Senegal	Accepted - built/under construction	Equipement	2014	No	*	Indoor air quality;Climate change adaptation;Thermal comfort
9	Estran	Biarritz, France	Not accepted	Office	2019	No	LBC;HQE	Indoor water management;Resistance to mechanical stress;Others (not specified);Waste management;Indoor air quality;Outdoor water management;Visual/lighting comfort;Climate change adaptation;Biodiversity hosting;Thermal comfort
10	Groupe Scolaire des Sciences et de la Biodiversité	Boulogne-Billancourt	Accepted - built/under construction	Equipement	2010	No	E+C-;HQE	Outdoor water management;Visual/lighting comfort;Biodiversity hosting
11	Osez Joséphine	Rueil Malmaison	Not accepted	Mixed-use	2019	Partial	WEEL community;Well residential;BiodiverCity	Outdoor air quality;Resistance to mechanical stress;Lightening of the structure;Indoor water management;Others (not specified);Indoor air quality;Outdoor water management;Waste management;Visual/lighting comfort;Climate change adaptation;Biodiversity hosting;Thermal comfort
12	Parramata	Parramata, Australia	Not accepted	Office	2013	No	*	Others (not specified);Indoor air quality;Climate change adaptation;Thermal comfort
13	Pôle d'Excellence du Biomimétisme Marin	Biarritz, France	Not accepted	Office	2019	No	LBC	Acoustic comfot;Resistance to mechanical stress;Lightening of the structure;Indoor water management;Others (not specified);Waste management;Indoor air quality;Outdoor water management;Visual/lighting comfort;Climate change adaptation;Biodiversity hosting;Thermal comfort
14	Residence solaire	Senlis, France	Accepted - not built	Housing	2018	No	*	Outdoor water management;Visual/lighting comfort;Climate change adaptation;Biodiversity hosting;Thermal comfort;Waste management
15	Skolkovo Innovation Center	Skolkovo, Russia	Accepted - built/under construction	Housing	2012	No	LEED	Waste management;Indoor air quality;Outdoor water management;Visual/lighting comfort;Climate change adaptation;Biodiversity hosting;Thermal comfort;Outdoor air quality
16	Tour D2	Paris, France	Accepted - built/under construction	Office	2007	No	WEEL;BREEAM;RT2012;NF HQE	Lightening of the structure;Indoor water management;Visual/lighting comfort;Biodiversity hosting;Thermal comfort
